# Supplementary material for: Distinct Mechanisms of Inadequate Erythropoiesis Induced by Tumor Necrosis Factor Alpha or Malarial Pigment
Source: PubMed Central journal article supplement (PMC4363658; doi:10.1371/journal.pone.0119836), 2015-03-17
Supplement: pone.0119836.s004.pdf [file pone.0119836.s004.pdf]

### Supporting Information: File 3

Table 1: Cell lineage content of erythroblast cultures **before** magnetic bead enrichment. Erythroid cells are defined as expressing CD71+CD235a+ or CD71+CD235a- and labelled with anti-bodies described in materials and methods. T and B lymphocytes were identified by flow cytometry using fluorochrome-conjugated antibodies specific to CD3 and CD19; macrophages were identified using antibodies specific to CD14.

| Donor | Proportion of live cells (%) |          |            |
|-------|------------------------------|----------|------------|
|       | Erythroid                    | Lymphoid | Macrophage |
| 1     | 21                           | 78       | 0.2        |
| 2     | 14                           | 85       | 1.4        |
| 3     | 13                           | 86       | 0.4        |
| 4     | 52                           | 46       | 2.3        |

Table 2: Cell lineage content of cells used **following** magnetic bead enrichment for erythroid cells. The proportion of live events acquired is shown to demonstrate the biologically responsive component of the culture used for micro-array and qPCR (see materials and methods for details)

| Donor | Use   |      | Proportion of live cells (%) |          |                |
|-------|-------|------|------------------------------|----------|----------------|
|       | Array | qPCR | Erythroid                    | Lymphoid | Macrophage     |
| 1     | yes   | yes  | 97                           | 0.1      | Not determined |
| 2     | yes   | yes  | 98                           | 0.2      | Not determined |
| 3     | no    | yes  | 94                           | 0.7      | Not determined |
| 4     | no    | yes  | 95                           | 2        | 1.5            |

Table 3: Viability of erythroblasts in untreated cultures 24 hours after magnetic bead isolation to demonstrate validity of culture conditions.

| Donor | Use   |      | Viabile cells (%) |
|-------|-------|------|-------------------|
|       | Array | qPCR | Erythroid         |
| 1     | yes   | yes  | 97                |
| 2     | no    | yes  | 98                |
| 3     | no    | yes  | 99                |
| 4     | no    | yes  | 98                |
